# Supplementary material for: A Direct Comparison of rAAV5 Variants Derived from the Baculovirus Expression System Using LC-MS Workflows Demonstrates Key Differences in Overall Production Yield, Product Quality and Vector Efficiency
Source: MDPI journal article supplement (doi:10.3390/ijms25052785), 2024-02-28
Supplement: s1 [file s1]

# A Direct Comparison of rAAV5 Variants Derived from the Baculovirus Expression System Using LC-MS Workflows Demonstrates Key Differences in Overall Production Yield, Product Quality and Vector Efficiency

Felipe Guapo <sup>1,†</sup>, Nicholas Donohue <sup>1,†</sup>, Lisa Strasser <sup>1</sup>, Stefano Boi <sup>1</sup>, Florian Füssl <sup>1</sup>, Alana Rainbow-Fletcher <sup>2</sup>, Paul Getty <sup>2</sup>, Ian Anderson <sup>2</sup>, Niall Barron <sup>1,3,\*</sup> and Jonathan Bones <sup>1,3,\*</sup>

<sup>1</sup> National Institute for Bioprocessing Research and Training, Foster Avenue, Mount Merrion, Blackrock, A94 X099 Dublin, Ireland

<sup>2</sup> Pharmaron, 12 Estuary Banks, Speke, Liverpool L24 8RB, UK

<sup>3</sup> School of Chemical and Bioprocess Engineering, University College Dublin, Belfield, Dublin 4, D04 V1W8 Dublin, Ireland

\* Correspondence: niall.barron@nibrt.ie (N.B.); jonathan.bones@nibrt.ie (J.B.)

† These authors contributed equally to this work.

## Supplementary Material

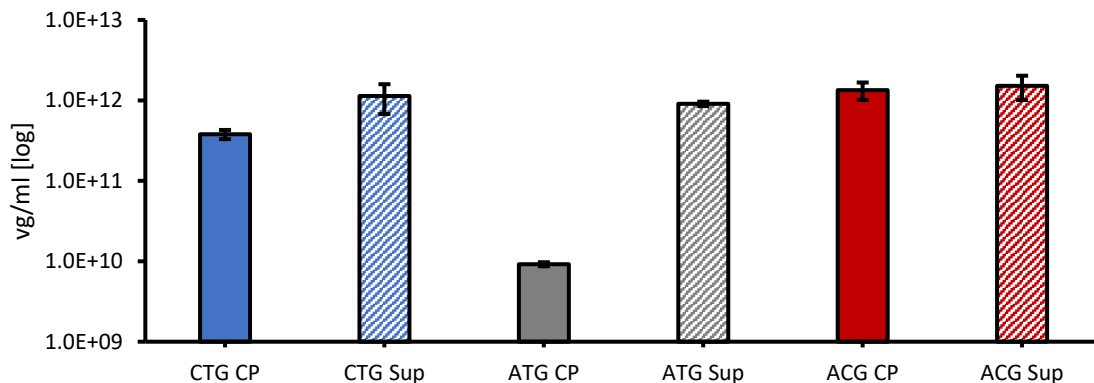

**Figure S1:** Total yield measured by qPCR representing material generated from recombinant and wild type AAV5 with harvest taking place after 72hr.

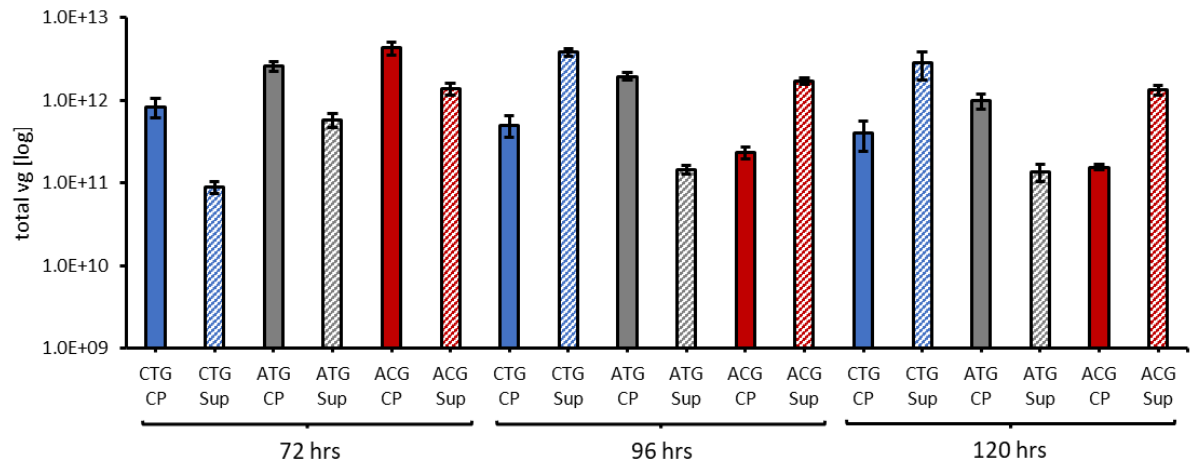

**Figure S2:** Total yield measured by qPCR representing material generated from recombinant and wild type AAV5 repeats, with harvest taking place after 72, 96 and 120 hr.

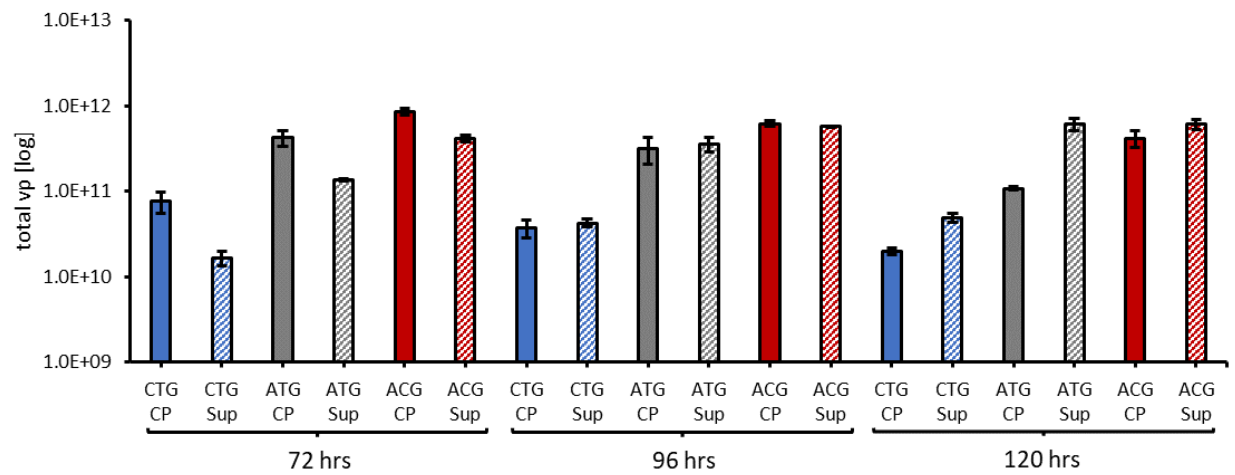

**Figure S3:** Total titre/yield measured by capsid ELISA representing material generated from recombinant and wild type AAV5, with harvest taking place after 72, 96 and 120 hr.

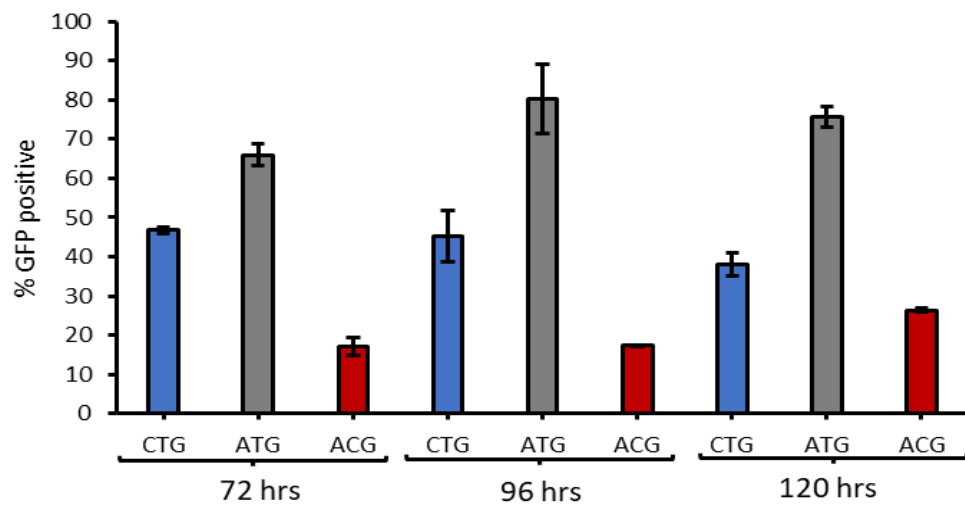

**Figure S4:** *In vitro* potency assay of wild type and variant capsids in CHO-K1 cells. Measurements taken using the cell pellet samples only.

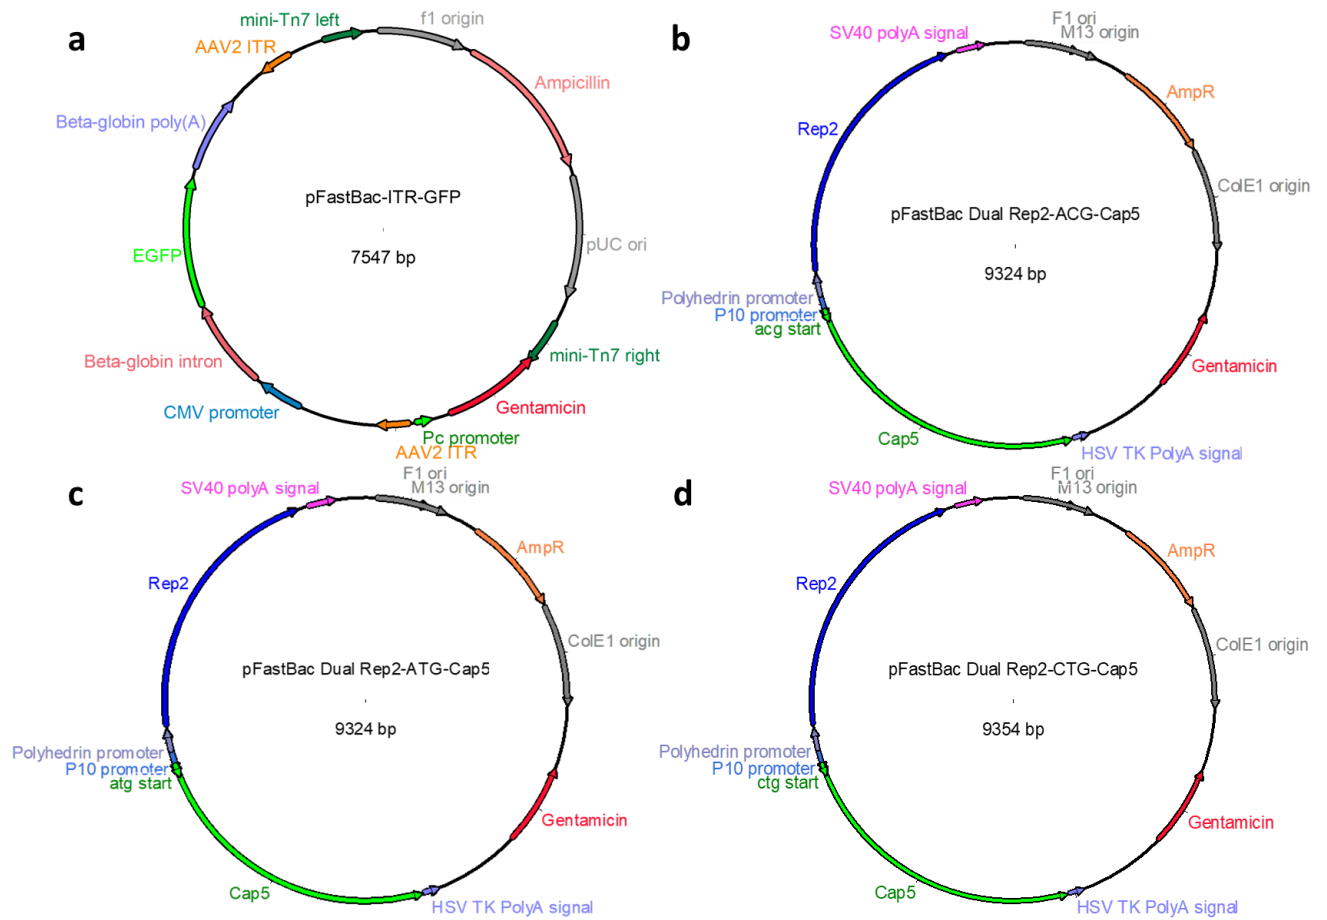

**Figure S5:** Plasmid maps of constructs used to generate Baculovirus, which were subsequently used to produce AAV. **a**, gene-of-interest carrying construct containing the GFP gene flanked by AAV2 ITR sequences. **b**, ACG start codon variant of the Rep/Cap carrying construct. **c**, ATG start codon variant of the Rep/Cap carrying construct. **d**, CTG start codon variant of the Rep/Cap carrying construct. GenBank accession numbers are as follows: BankIt2794929pFastBac-ITR-GFP: PP328554, BankIt2794929pFastBacDual-Rep2-ACG-Cap5: PP328555, BankIt2794929pFastBacDual-Rep2-ATG-Cap5: PP328556, BankIt2794929pFastBacDual-Rep2-CTG-Cap5: PP328557.

**Table S1:** VP ratio analysis per replicate of rAAV based on a total ratio theoretical value of 12 (1:1:10, VP1:2:3) calculated using peak area quantitation based on the FLR signal during HILIC separation and used to plot bar charts available in the main text.

|         | VP1   |       |       |         |       | VP2   |       |       |         |       | VP3    |        |        |         |       |
|---------|-------|-------|-------|---------|-------|-------|-------|-------|---------|-------|--------|--------|--------|---------|-------|
|         | Rep 1 | Rep 2 | Rep 3 | Average | SD    | Rep 1 | Rep 2 | Rep 3 | Average | SD    | Rep 1  | Rep 2  | Rep 3  | Average | SD    |
| CTG CP  | 0.710 | 0.742 | 0.736 | 0.729   | 0.014 | 0.786 | 0.749 | 0.767 | 0.767   | 0.015 | 10.504 | 10.509 | 10.497 | 10.504  | 0.005 |
| CTG SUP | 0.370 | 0.413 | 0.543 | 0.442   | 0.074 | 0.486 | 0.364 | 0.686 | 0.512   | 0.133 | 11.144 | 11.223 | 10.771 | 11.046  | 0.197 |
| ATG CP  | 0.396 | 0.339 | 0.291 | 0.342   | 0.043 | 0.403 | 0.365 | 0.328 | 0.366   | 0.030 | 11.201 | 11.295 | 11.380 | 11.292  | 0.073 |
| ATG SUP | 0.547 | 0.484 | 0.540 | 0.524   | 0.028 | 0.445 | 0.388 | 0.500 | 0.444   | 0.046 | 11.008 | 11.128 | 10.960 | 11.032  | 0.071 |
| ACG CP  | 0.338 | 0.338 | 0.336 | 0.337   | 0.001 | 0.785 | 0.805 | 0.832 | 0.808   | 0.019 | 10.877 | 10.857 | 10.831 | 10.855  | 0.018 |
| ACG SUP | 0.365 | 0.362 | 0.361 | 0.363   | 0.002 | 0.790 | 0.784 | 0.744 | 0.772   | 0.020 | 10.845 | 10.855 | 10.895 | 10.865  | 0.022 |

**Table S2:** Percentage of empty and full capsids per replicate of rAAV quantified by native mass spectrometry and AEX-LC and used to plot bar charts available in the main text.

| Native MS |              |              |              |              |              |              |                |       |           |      |
|-----------|--------------|--------------|--------------|--------------|--------------|--------------|----------------|-------|-----------|------|
|           | <i>Rep 1</i> | <i>Rep 2</i> | <i>Rep 3</i> | <i>Rep 1</i> | <i>Rep 2</i> | <i>Rep 3</i> | <i>Average</i> |       | <i>SD</i> |      |
|           |              | %E           |              |              | %F           |              | %E             | %F    | %E        | %F   |
| CTG CP    | 41.30        | 41.20        | 40.40        | 58.70        | 58.80        | 59.60        | 40.97          | 59.03 | 0.40      | 0.40 |
| CTG SUP   | 31.90        | 32.70        | 32.20        | 68.10        | 67.30        | 67.80        | 32.27          | 67.73 | 0.33      | 0.33 |
| ATG CP    | 30.30        | 31.30        | 30.00        | 69.70        | 68.70        | 70.00        | 30.53          | 69.47 | 0.56      | 0.56 |
| ATG SUP   | 30.90        | 30.60        | 30.60        | 69.10        | 69.40        | 69.40        | 30.70          | 69.30 | 0.14      | 0.14 |
| ACG CP    | 52.60        | 56.00        | 56.80        | 47.40        | 44.00        | 43.20        | 55.13          | 44.87 | 1.82      | 1.82 |
| ACG SUP   | 52.40        | 71.70        | 71.90        | 47.60        | 28.30        | 28.10        | 65.33          | 34.67 | 9.15      | 9.15 |

  

| AEX-LC-FLR |       |       |       |       |       |       |       |       |      |      |
|------------|-------|-------|-------|-------|-------|-------|-------|-------|------|------|
| CTG CP     | 23.25 | 22.16 | 21.92 | 76.74 | 77.84 | 78.08 | 22.44 | 77.55 | 0.58 | 0.58 |
| CTG SUP    | 21.12 | 22.53 | 20.65 | 78.88 | 77.47 | 79.35 | 21.43 | 78.57 | 0.80 | 0.80 |
| ATG CP     | 26.34 | 26.31 | 26.63 | 73.66 | 73.69 | 73.37 | 26.43 | 73.57 | 0.14 | 0.14 |
| ATG SUP    | 26.13 | 24.76 | 26    | 73.87 | 75.24 | 74    | 25.63 | 74.37 | 0.62 | 0.62 |
| ACG CP     | 46.22 | 46.66 | 46.01 | 53.78 | 53.34 | 53.99 | 46.30 | 53.70 | 0.27 | 0.27 |
| ACG SUP    | 52.8  | 53.53 | 52.52 | 47.2  | 46.47 | 47.48 | 52.95 | 47.05 | 0.43 | 0.43 |

**Table S3:** MS acquisition parameters used for charge detection mass spectrometry based on the Direct Mass Technology™ (DMT) mode provided by Thermo Scientific on a Q Exactive Ultra High Mass Range (UHMR) mass spectrometer (Thermo Scientific, Bremen, Germany).

| Parameter                     | Setting     |
|-------------------------------|-------------|
| Spray voltage                 | 0.9 kV      |
| Capillary temperature         | 275°C       |
| S-lens RF level               | 200         |
| Resolution setting at m/z 400 | 50,000      |
| Trapping gas                  | Nitrogen    |
| UHV pressure (mbar)           | 4.6e-10 mab |
| IST desolvation voltage       | -150 V      |
| Averaging                     | Off         |
| Detector m/z optimization     | High        |
| Ion transfer target           | High        |
| Ion Injection                 | IT = 200    |
